# Supplementary material for: Refinement of the environmental and chronological context of the archeological site El Harhoura 2 (Rabat, Morocco) using paleoclimatic simulations
Source: Copernicus journal article supplement (doi:10.5194/cp-19-1245-2023), 2023-06-21
Supplement: Supplementary file 1 [file cp-19-1245-2023-supplement.pdf]

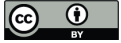

*Supplement of*

**Refinement of the environmental and chronological context of the archeological site El Harhoura 2 (Rabat, Morocco) using paleoclimatic simulations**

**Léa Terray et al.**

*Correspondence to:* Léa Terray (lea.terray@gmail.com)

The copyright of individual parts of the supplement might differ from the article licence.

## Supplementary material

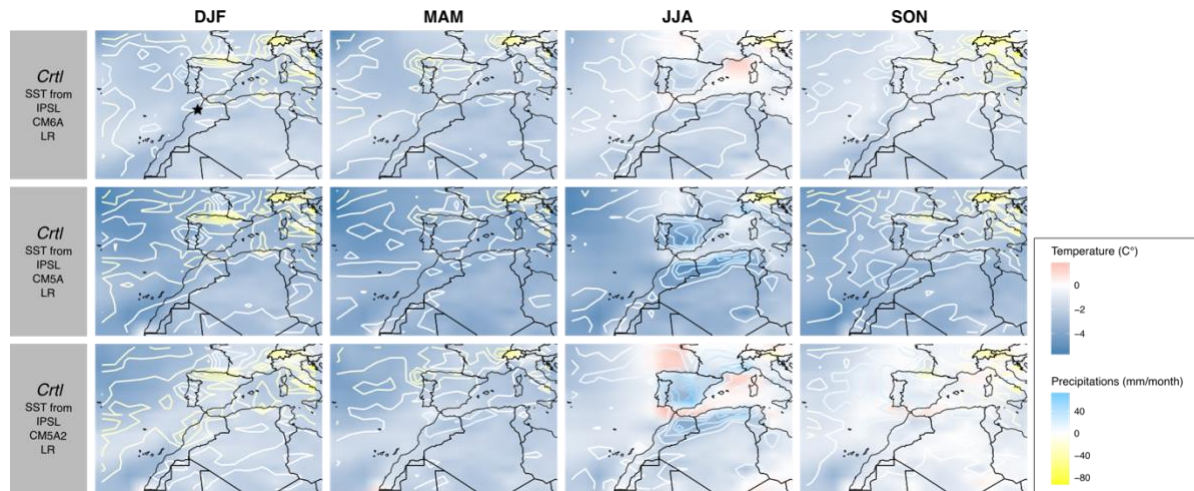

**Fig. S1.** Maps of EH2 region showing the impact of SST biases on the simulated current climate.

- 5 Mean temperature (color, unit: °C) and precipitation (isolines, unit: mm/month) for the four seasons from *Ctrl* prescribed with the simulated SSTs from the *historical* simulations run with the IPSL-CM6A-LR (top), IPSL-CM5A-LR (middle) and IPSL-CM5A2-LR (bottom) models are presented in contrast with mean temperature and precipitation from *Ctrl* prescribed with AMIP SSTs. The differences are estimated over the last 30 years of each simulation. EH cave location is represented by the star in the
- 10 upper left panel. DJF: December, January, February (winter); MAM: March, April, May (spring); JJA: June, July, August (summer); SON: September, October, November (autumn).

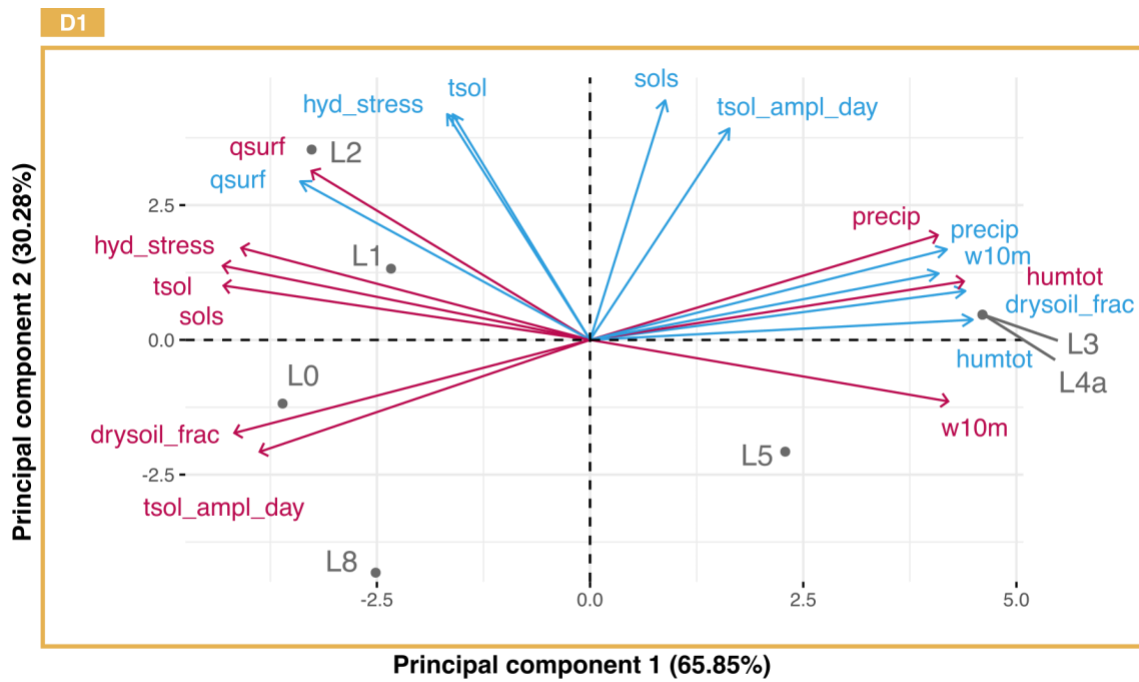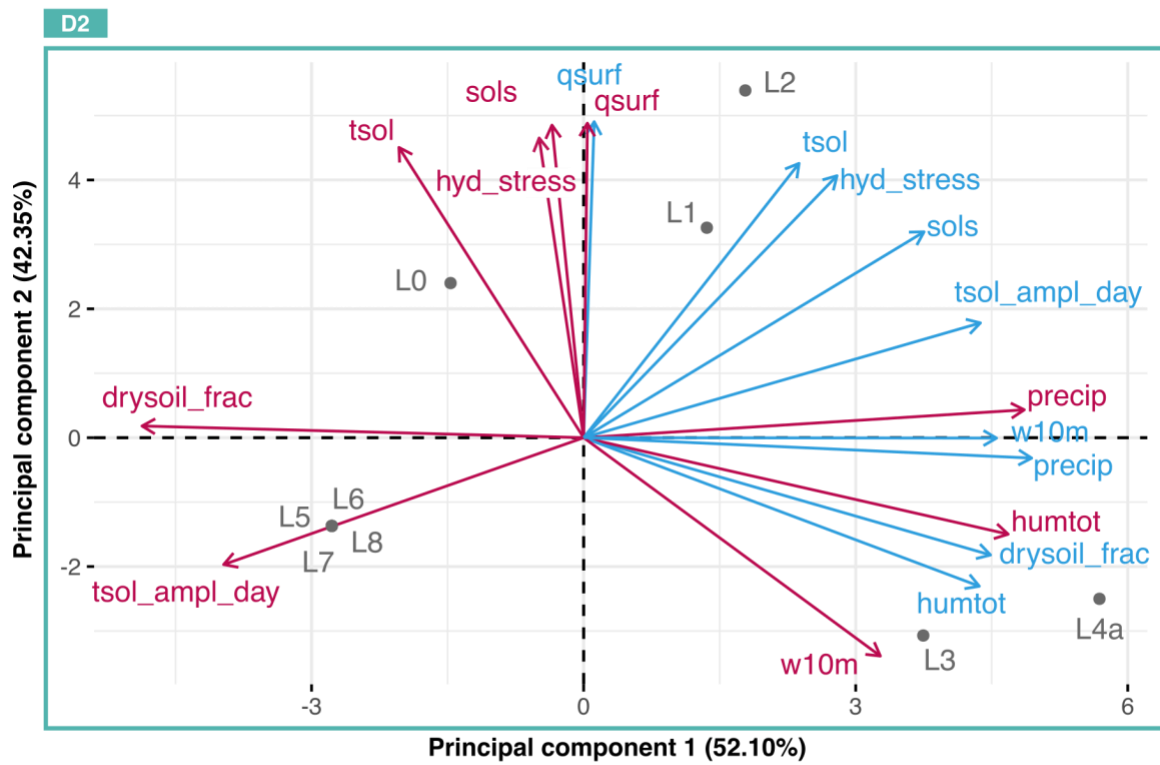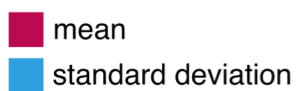

15

**Fig. S2.** Biplots of EH layers and climate variables according to D1 (Dating Hypothesis 1; brown panel) and D2 (Dating Hypothesis 2; blue panel).
